# Supplementary material for: Symmetric pseudocapacitors based on molybdenum disulfide (MoS2)-modified carbon nanospheres: correlating physicochemistry and synergistic interaction on energy storage
Source: Royal Society of Chemistry journal article supplement (doi:10.1039/c6ta00114a), 2016-01-01
Supplement: c6ta00114a1.pdf [file c6ta00114a1.pdf]

## **SUPPORTING INFORMATION**

### **Symmetric pseudocapacitors based on molybdenum disulfide (MoS<sub>2</sub>)-modified carbon nanospheres: Correlating physico- chemistry and synergistic interaction on energy storage**

**Tobile N.Y. Khawula<sup>1</sup>, Kumar Raju<sup>2</sup>, Paul J. Franklyn<sup>3</sup>, Iakovos Sigalas<sup>1,\*</sup> and Kenneth  
I. Ozoemena<sup>2,3,\*</sup>**

*<sup>1</sup>School of Chemical and Metallurgical Engineering, University of the Witwatersrand,  
Johannesburg 2050, South Africa*

*<sup>2</sup>Energy Materials, Materials Science and Manufacturing, Council for Scientific and  
Industrial Research (CSIR), Pretoria 0001, South Africa*

*<sup>3</sup>School of Chemistry, University of the Witwatersrand, Johannesburg 2050, South Africa*

---

\* Authors to whom correspondence should be addressed: K.I. Ozoemena; E-mail:  
[kozoemena@csir.co.za](mailto:kozoemena@csir.co.za).

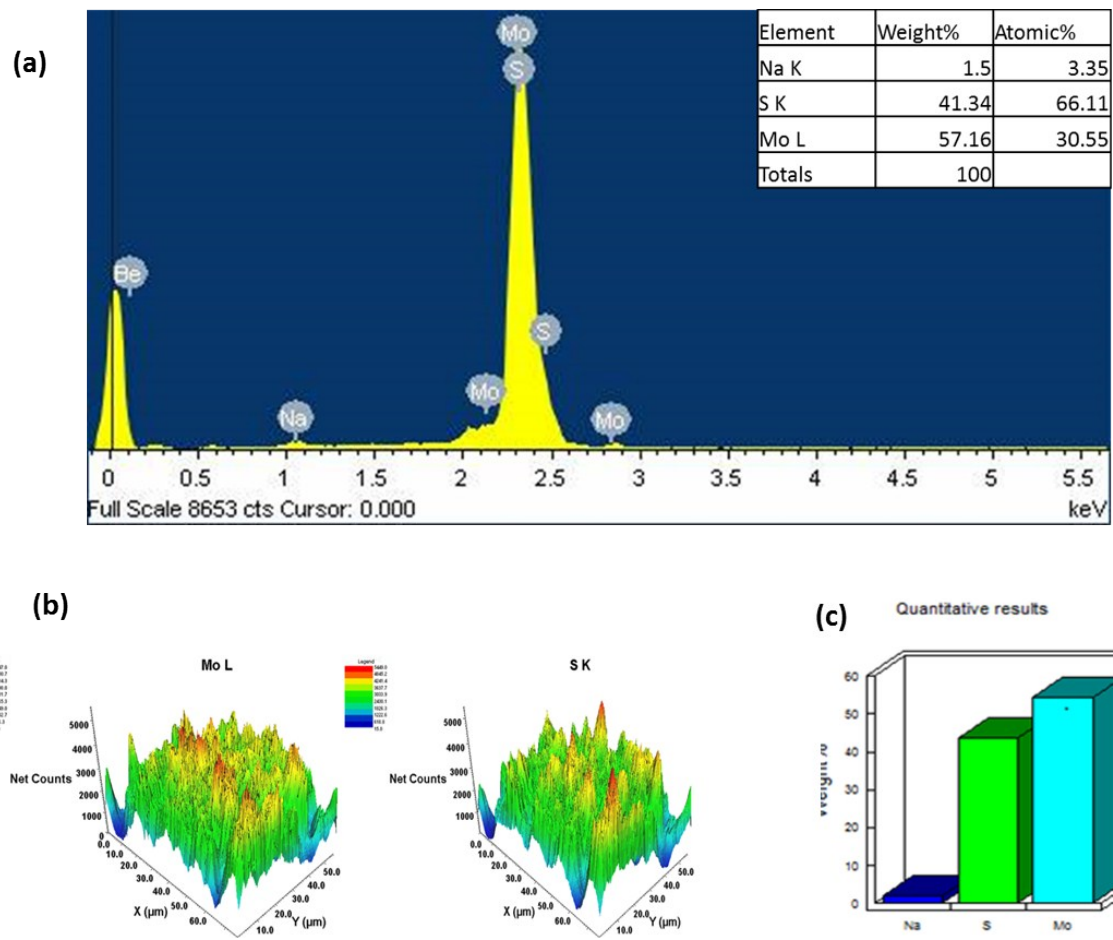

**Figure-S1:** (a) EDS spectra and elemental composition of s-MoS<sub>2</sub>, (b) 3-D EDS topographical profile of the Mo and S, in s-MoS<sub>2</sub>, and (c) bar chart representation of the elemental composition of s-MoS<sub>2</sub>

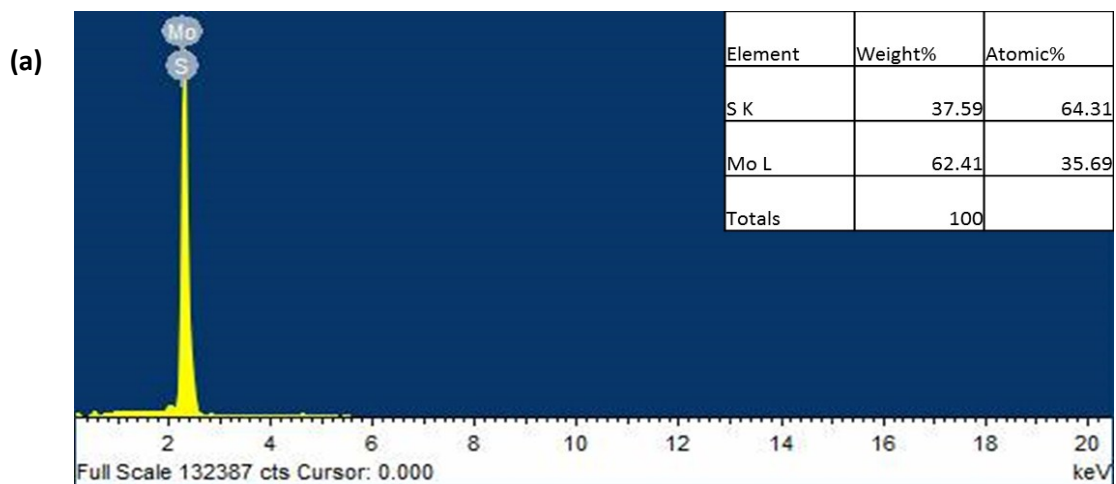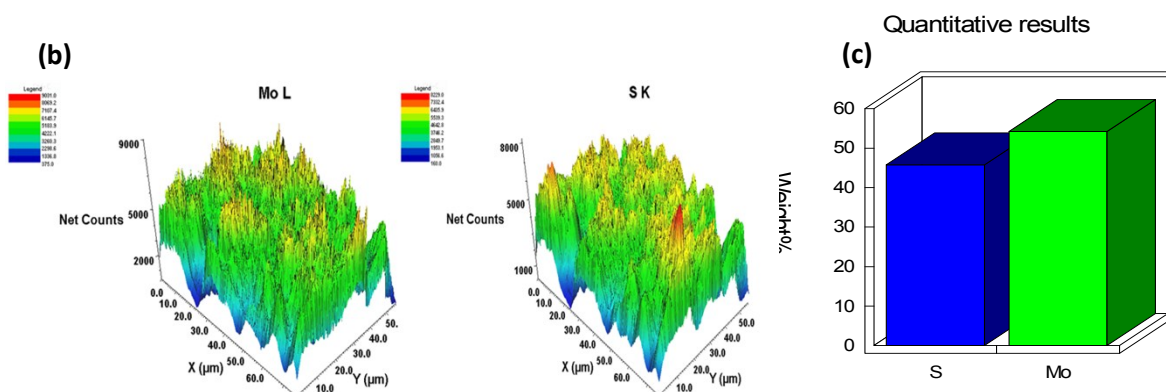

**Figure-S2:** (a) EDS spectra and elemental composition of f-MoS<sub>2</sub>, (b) 3-D EDS topographical profile of the Mo and S, in f-MoS<sub>2</sub>, and (c) bar chart representation of the elemental composition of f-MoS<sub>2</sub>

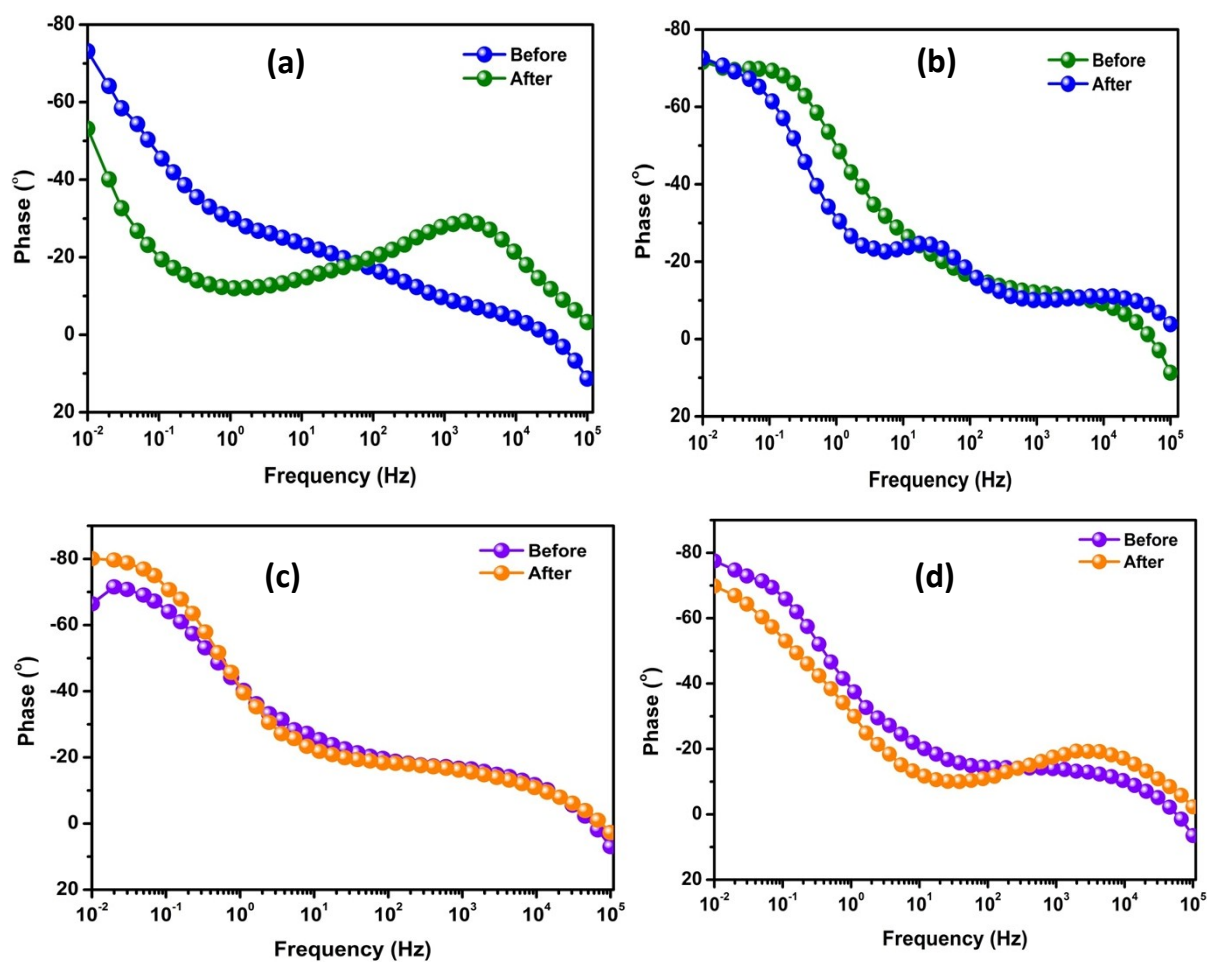

**Figure-S3:** Typical Bode plots for the symmetric pseudocapacitors based on (a) s-MoS<sub>2</sub>, (b) s-MoS<sub>2</sub>/CNS (c) s-MoS<sub>2</sub>, and (d) s-MoS<sub>2</sub>/CNS based materials obtained before and after 50-hour voltage experiments.
